# Supplementary material
Source: PubMed Central journal article supplement (PMC10374850)
Supplement: 432_2023_4707_MOESM1_ESM.pdf [file 432_2023_4707_MOESM1_ESM.pdf]

**Title:**

**Impact of the COVID-19 pandemic on reported cancer diagnoses in Bavaria, Germany**

Journal:

Journal of Cancer Research and Clinical Oncology

Authors:

Sven Voigtländer<sup>1</sup>, Amir Hakimhashemi<sup>1</sup>, Nina Grundmann<sup>1</sup>, Martin Radespiel-Tröger<sup>1</sup>,  
Elisabeth C. Inwald<sup>2</sup>, Olaf Ortmann<sup>2</sup>, Michael Gerken<sup>3</sup>, Stefanie J. Klug<sup>4</sup>, Monika  
Klinkhammer-Schalke<sup>3</sup>, Martin Meyer<sup>1</sup>, Jacqueline Müller-Nordhorn<sup>1</sup>

<sup>1</sup> Bavarian Cancer Registry, Bavarian Health and Food Safety Authority, Schweinauer  
Hauptstraße 80, 90441 Nuremberg, Germany

<sup>2</sup> Department of Gynecology and Obstetrics, University Medical Center, Landshuter Straße  
65, 93053 Regensburg

<sup>3</sup> Institute for Quality Assurance and Health Services Research, University of Regensburg,  
Am BioPark 9, 93053 Regensburg

<sup>4</sup> Chair of Epidemiology, Department of Sport and Health Sciences, Technical University of  
Munich, Georg-Brauchle-Ring 56, 80992 München

Corresponding author:

Dr. Sven Voigtländer

Bavarian Cancer Registry, Bavarian Health and Food Safety Authority

Schweinauer Hauptstraße 80, 90441 Nuremberg, Germany

Phone: +49-(0)9131-6808-2927

Email: [sven.voigtlaender@lgl.bayern.de](mailto:sven.voigtlaender@lgl.bayern.de)

ORCID ID: <https://orcid.org/0000-0003-3808-9605>

**Supplementary Figures**

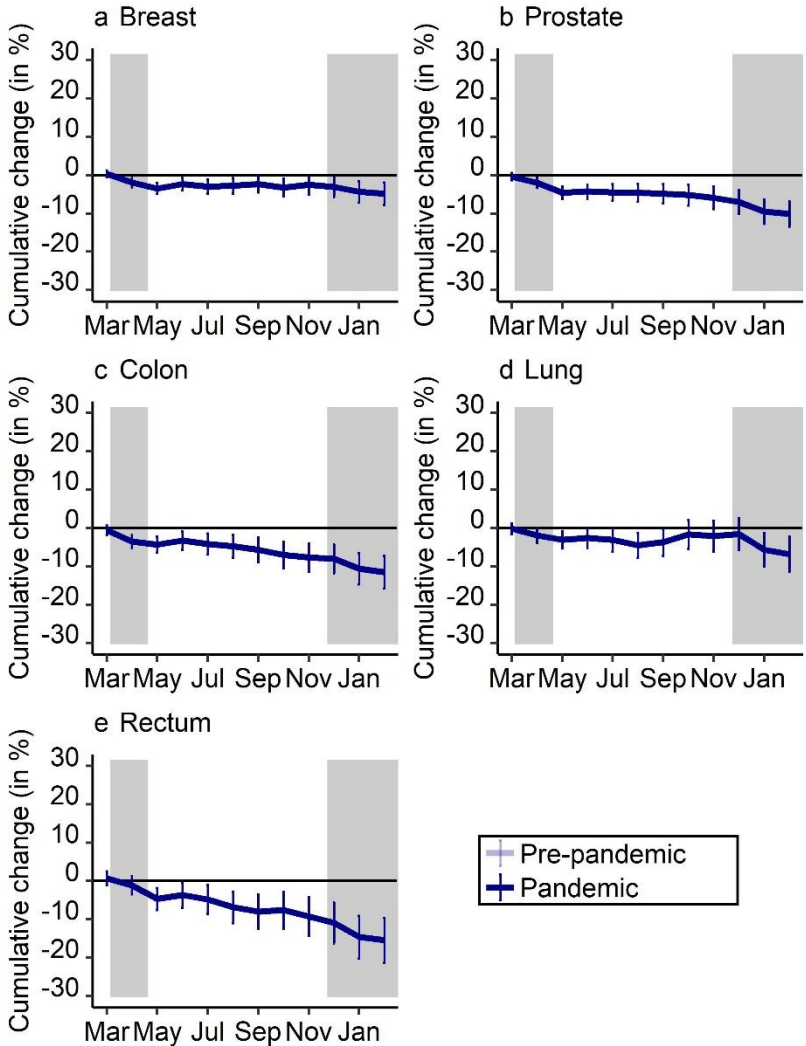

**Supplementary Fig. 1** Cumulative percentage change of incident malignant neoplasms for the five most frequent sites (breast, prostate, colon, lung, and rectum) during the COVID-19 pandemic (March 2020 to February 2021) compared to the pre-pandemic period (March 2019 to February 2020), stratified by month of year

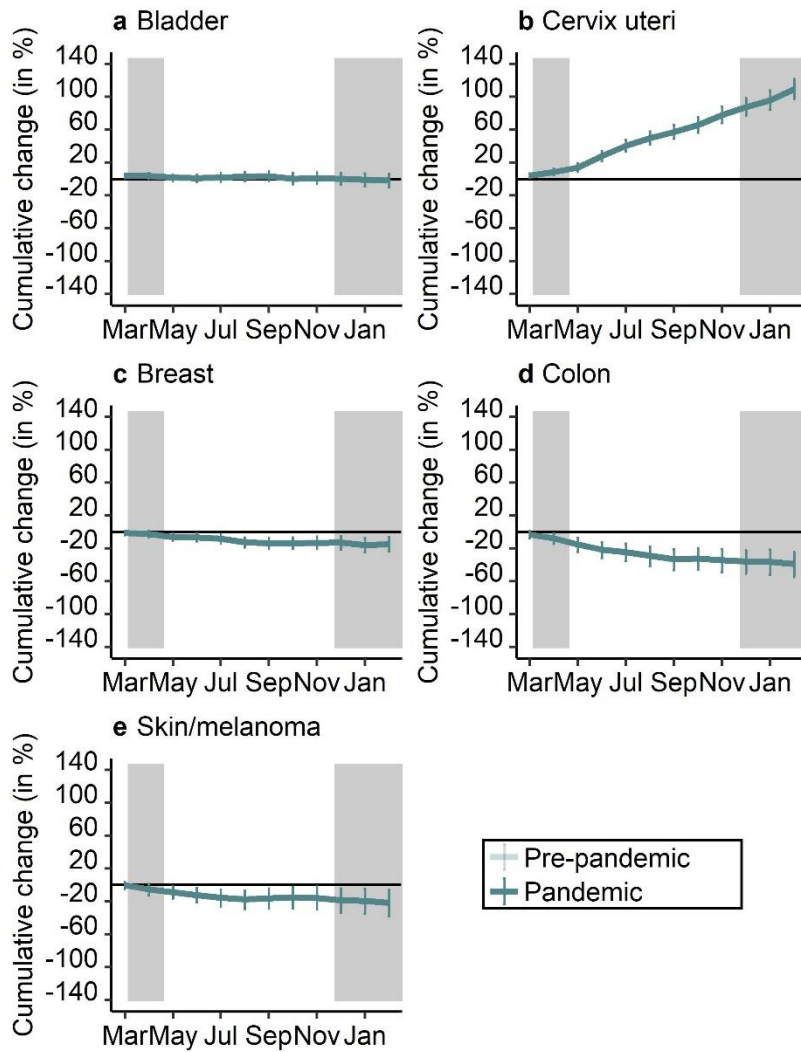

**Supplementary Fig. 2** Cumulative percentage change of incident carcinoma in situ for the five most frequent sites (bladder, cervix uteri, breast, colon, and skin/melanoma) during the COVID-19 pandemic (March 2020 to February 2021) compared to the pre-pandemic period (March 2019 to February 2020), stratified by month of year

## Supplementary Tables

Supplementary Table 1: Incident malignant neoplasms and carcinoma in situ for cervix uteri during the COVID-19 pandemic (March 2020 to February 2021) compared to the pre-pandemic period (March 2019 to February 2020)

| <b>Tumour site (ICD-10)</b> | <b>Pre-pandemic period: Cases</b> | <b>Pandemic period: Cases</b> | <b>Difference (% [95% CI])</b> |
|-----------------------------|-----------------------------------|-------------------------------|--------------------------------|
| <b>Cervix uteri (C53)</b>   |                                   |                               |                                |
| 20-34 years                 | 51                                | 51                            | 0 (0.0 [-32.2; 47.4])          |
| 35 years and above          | 412                               | 457                           | 45 (10.9 [-2.9; 26.7])         |
| Total                       | 463                               | 508                           | 45 (9.7 [-3.3; 24.4])          |
| <b>Cervix uteri (D06)</b>   |                                   |                               |                                |
| 20-34 years                 | 498                               | 779                           | 281 (56.4 [39.8; 75.0])        |
| 35 years and above          | 541                               | 1,397                         | 856 (158.2 [133.8; 185.2])     |
| Total                       | 1,042                             | 2,180                         | 1,138 (109.2 [94.3; 125.2])    |

Notes: ICD-10, International Statistical Classification of Diseases and Related Health Problems, Tenth Revision; CI, confidence interval.

Supplementary Table 2: Number of incident malignant neoplasms and carcinoma in situ (with and without cervix uteri) from March 2019 to February 2021, stratified by period (pre-pandemic: March 2019 to February 2020; pandemic: March 2020 to February 2021) and month of year

|                                                 | Pre-pandemic period: Cases | Pandemic period: Cases | Difference (% [95% CI])     |
|-------------------------------------------------|----------------------------|------------------------|-----------------------------|
| <b>Malignant Neoplasms</b>                      |                            |                        |                             |
| March                                           | 3,622                      | 3,597                  | -25 (-0.7 [-5.2; 4.0])      |
| April                                           | 3,529                      | 2,793                  | -736 (-20.9 [-24.7; -16.8]) |
| May                                             | 3,689                      | 2,982                  | -707 (-19.2 [-23.0; -15.2]) |
| June                                            | 2,954                      | 3,372                  | 418 (14.2 [ 8.6; 19.9])     |
| July                                            | 4,130                      | 4,018                  | -112 (-2.7 [-6.8; 1.6])     |
| August                                          | 3,331                      | 3,229                  | -102 (-3.1 [-7.6; 1.7])     |
| September                                       | 3,490                      | 3,558                  | 68 ( 1.9 [-2.7; 6.8])       |
| October                                         | 3,833                      | 3,742                  | -91 (-2.4 [-6.7; 2.1])      |
| November                                        | 3,560                      | 3,476                  | -84 (-2.4 [-6.8; 2.3])      |
| December                                        | 3,258                      | 3,078                  | -180 (-5.5 [-10.1; -0.8])   |
| January                                         | 3,823                      | 2,858                  | -965 (-25.2 [-28.8; -21.5]) |
| February                                        | 3,638                      | 3,277                  | -361 (-9.9 [-14.1; -5.6])   |
| Total                                           | 42,857                     | 39,980                 | -2,877 (-6.7 [-8.0; -5.4])  |
| <b>Carcinoma in situ (with cervix uteri)</b>    |                            |                        |                             |
| March                                           | 337                        | 407                    | 70 (20.8 [ 4.5; 39.5])      |
| April                                           | 330                        | 324                    | -6 (-1.8 [-15.8; 14.4])     |
| May                                             | 369                        | 326                    | -43 (-11.7 [-23.9; 2.5])    |
| June                                            | 258                        | 377                    | 119 (46.1 [24.7; 71.2])     |
| July                                            | 355                        | 471                    | 116 (32.7 [15.6; 52.3])     |
| August                                          | 321                        | 377                    | 56 (17.4 [ 1.2; 36.3])      |
| September                                       | 353                        | 411                    | 58 (16.4 [ 1.0; 34.2])      |
| October                                         | 378                        | 455                    | 77 (20.4 [ 5.0; 38.0])      |
| November                                        | 339                        | 479                    | 140 (41.3 [22.9; 62.4])     |
| December                                        | 337                        | 423                    | 86 (25.5 [ 8.8; 44.8])      |
| January                                         | 362                        | 411                    | 49 (13.5 [-1.4; 30.8])      |
| February                                        | 341                        | 478                    | 137 (40.2 [22.0; 61.1])     |
| Total                                           | 4,080                      | 4,939                  | 859 (21.1 [16.1; 26.2])     |
| <b>Carcinoma in situ (without cervix uteri)</b> |                            |                        |                             |
| March                                           | 256                        | 283                    | 27 (10.5 [-6.6; 30.9])      |
| April                                           | 251                        | 200                    | -51 (-20.3 [-33.8; -4.1])   |
| May                                             | 269                        | 167                    | -102 (-37.9 [-48.8; -24.7]) |
| June                                            | 203                        | 179                    | -24 (-11.8 [-27.9; 7.8])    |
| July                                            | 275                        | 259                    | -16 (-5.8 [-20.5; 11.6])    |
| August                                          | 251                        | 210                    | -41 (-16.3 [-30.3; 0.5])    |
| September                                       | 251                        | 231                    | -20 (-8.0 [-23.0; 10.0])    |
| October                                         | 277                        | 267                    | -10 (-3.6 [-18.5; 14.0])    |
| November                                        | 257                        | 270                    | 13 (5.1 [-11.4; 24.6])      |
| December                                        | 235                        | 221                    | -14 (-6.0 [-21.7; 13.0])    |
| January                                         | 270                        | 232                    | -38 (-14.1 [-27.9; 2.4])    |
| February                                        | 243                        | 240                    | -3 (-1.2 [-17.4; 18.1])     |
| Total                                           | 3,038                      | 2,759                  | -279 (-9.2 [-13.7; -4.4])   |

Notes: CI, confidence interval.

Supplementary Table 3: Number of incident malignant neoplasms from March 2019 to February 2021, stratified by tumour site (breast, prostate, colon, lung, rectum), period (pre-pandemic: March 2019 to February 2020; pandemic: March 2020 to February 2021) and month of year

|                 | Pre-pandemic period: Cases | Pandemic period: Cases | Difference (% [95% CI])     |
|-----------------|----------------------------|------------------------|-----------------------------|
| <b>Breast</b>   |                            |                        |                             |
| March           | 733                        | 761                    | 28 ( 3.8 [-6.2; 14.9])      |
| April           | 737                        | 538                    | -199 (-27.0 [-34.7; -18.4]) |
| May             | 720                        | 587                    | -133 (-18.5 [-26.9; -9.1])  |
| June            | 542                        | 640                    | 98 (18.1 [ 5.3; 32.4])      |
| July            | 849                        | 792                    | -57 (-6.7 [-15.3; 2.8])     |
| August          | 655                        | 676                    | 21 (3.2 [-7.3; 14.9])       |
| September       | 709                        | 749                    | 40 (5.6 [-4.7; 17.1])       |
| October         | 839                        | 758                    | -81 (-9.7 [-18.1; -0.3])    |
| November        | 697                        | 759                    | 62 ( 8.9 [-1.7; 20.7])      |
| December        | 722                        | 673                    | -49 (-6.8 [-16.1; 3.5])     |
| January         | 753                        | 640                    | -113 (-15.0 [-23.5; -5.6])  |
| February        | 747                        | 705                    | -42 (-5.6 [-14.9; 4.6])     |
| Total           | 8,703                      | 8,278                  | -425 (-4.9 [-7.7; -2.0])    |
| <b>Prostate</b> |                            |                        |                             |
| March           | 577                        | 550                    | -27 (-4.7 [-15.2; 7.1])     |
| April           | 529                        | 421                    | -108 (-20.4 [-30.0; -9.5])  |
| May             | 619                        | 448                    | -171 (-27.6 [-35.9; -18.3]) |
| June            | 451                        | 471                    | 20 (4.4 [-8.2; 18.8])       |
| July            | 634                        | 620                    | -14 (-2.2 [-12.5; 9.2])     |
| August          | 468                        | 462                    | -6 (-1.3 [-13.2; 12.3])     |
| September       | 559                        | 541                    | -18 (-3.2 [-14.0; 8.9])     |
| October         | 588                        | 566                    | -22 (-3.7 [-14.2; 8.0])     |
| November        | 589                        | 540                    | -49 (-8.3 [-18.4; 3.0])     |
| December        | 487                        | 416                    | -71 (-14.6 [-25.1; -2.6])   |
| January         | 583                        | 415                    | -168 (-28.8 [-37.2; -19.3]) |
| February        | 565                        | 524                    | -41 (-7.3 [-17.7; 4.4])     |
| Total           | 6,649                      | 5,974                  | -675 (-10.2 [-13.2; -7.0])  |
| <b>Colon</b>    |                            |                        |                             |
| March           | 325                        | 302                    | -23 (-7.1 [-20.6; 8.7])     |
| April           | 356                        | 238                    | -118 (-33.1 [-43.3; -21.2]) |
| May             | 331                        | 298                    | -33 (-10.0 [-23.0; 5.3])    |
| June            | 272                        | 314                    | 42 (15.4 [-1.9; 35.8])      |
| July            | 387                        | 352                    | -35 (-9.0 [-21.3; 5.1])     |
| August          | 329                        | 304                    | -25 (-7.6 [-20.9; 8.0])     |
| September       | 337                        | 301                    | -36 (-10.7 [-23.5; 4.3])    |
| October         | 369                        | 315                    | -54 (-14.6 [-26.6; -0.8])   |
| November        | 348                        | 319                    | -29 (-8.3 [-21.3; 6.7])     |
| December        | 297                        | 285                    | -12 (-4.0 [-18.4; 12.9])    |
| January         | 344                        | 241                    | -103 (-29.9 [-40.6; -17.4]) |
| February        | 337                        | 299                    | -38 (-11.3 [-24.1; 3.7])    |
| Total           | 4,032                      | 3,568                  | -464 (-11.5 [-15.4; -7.4])  |
| <b>Lung</b>     |                            |                        |                             |
| March           | 316                        | 309                    | -7 (-2.2 [-16.4; 14.4])     |
| April           | 300                        | 240                    | -60 (-20.0 [-32.5; -5.2])   |
| May             | 287                        | 246                    | -41 (-14.3 [-27.7; 1.6])    |
| June            | 276                        | 293                    | 17 ( 6.2 [-9.9; 25.1])      |
| July            | 351                        | 332                    | -19 (-5.4 [-18.6; 9.9])     |
| August          | 275                        | 227                    | -48 (-17.5 [-30.8; -1.6])   |
| September       | 271                        | 298                    | 27 (10.0 [-6.7; 29.6])      |
| October         | 267                        | 340                    | 73 (27.3 [ 8.5; 49.5])      |

|               |       |       |                             |
|---------------|-------|-------|-----------------------------|
| November      | 283   | 266   | -17 (-6.0 [-20.5; 11.1])    |
| December      | 241   | 259   | 18 ( 7.5 [-9.8; 28.1])      |
| January       | 369   | 226   | -143 (-38.8 [-48.1; -27.7]) |
| February      | 300   | 258   | -42 (-14.0 [-27.2; 1.6])    |
| Total         | 3,536 | 3,294 | -242 (-6.8 [-11.2; -2.3])   |
| <b>Rectum</b> |       |       |                             |
| March         | 175   | 190   | 15 ( 8.6 [-11.6; 33.3])     |
| April         | 160   | 122   | -38 (-23.8 [-39.8; -3.5])   |
| May           | 192   | 117   | -75 (-39.1 [-51.6; -23.3])  |
| June          | 135   | 156   | 21 (15.6 [-8.2; 45.5])      |
| July          | 197   | 174   | -23 (-11.7 [-28.0; 8.3])    |
| August        | 177   | 134   | -43 (-24.3 [-39.5; -5.2])   |
| September     | 184   | 160   | -24 (-13.0 [-29.6; 7.5])    |
| October       | 164   | 172   | 8 (4.9 [-15.3; 29.9])       |
| November      | 165   | 131   | -34 (-20.6 [-36.9; -0.1])   |
| December      | 164   | 129   | -35 (-21.3 [-37.5; -0.9])   |
| January       | 197   | 119   | -78 (-39.6 [-51.9; -24.2])  |
| February      | 185   | 168   | -17 (-9.2 [-26.3; 11.9])    |
| Total         | 2,095 | 1,772 | -323 (-15.4 [-20.6; -9.9])  |

Notes: CI, confidence interval.

Supplementary Table 4: Number of carcinoma in situ from March 2019 to February 2021, stratified by tumour site (cervix uteri, bladder, breast, colon, skin/melanoma), period (pre-pandemic: March 2019 to February 2020; pandemic: March 2020 to February 2021), and month of year

|                     | Pre-pandemic period: Cases | Pandemic period: Cases | Difference (% [95% CI])     |
|---------------------|----------------------------|------------------------|-----------------------------|
| <b>Cervix uteri</b> |                            |                        |                             |
| March               | 81                         | 124                    | 43 (53.1 [15.7; 102.6])     |
| April               | 79                         | 124                    | 45 (57.0 [18.4; 108.1])     |
| May                 | 100                        | 159                    | 59 (59.0 [23.8; 104.2])     |
| June                | 55                         | 198                    | 143 (260.0 [167.0; 385.3])  |
| July                | 80                         | 212                    | 132 (165.0 [104.9; 242.7])  |
| August              | 70                         | 167                    | 97 (138.6 [80.5; 215.4])    |
| September           | 102                        | 180                    | 78 (76.5 [38.4; 125.0])     |
| October             | 101                        | 188                    | 87 (86.1 [46.2; 137.1])     |
| November            | 82                         | 209                    | 127 (154.9 [97.4; 229.0])   |
| December            | 102                        | 202                    | 100 (98.0 [56.1; 151.3])    |
| January             | 92                         | 179                    | 87 (94.6 [51.3; 150.2])     |
| February            | 98                         | 238                    | 140 (142.9 [91.9; 207.3])   |
| Total               | 1,042                      | 2,180                  | 1,138 (109.2 [94.3; 125.2]) |
| <b>Bladder</b>      |                            |                        |                             |
| March               | 91                         | 133                    | 42 (46.2 [11.9; 90.8])      |
| April               | 78                         | 76                     | -2 (-2.6 [-29.0; 33.6])     |
| May                 | 87                         | 67                     | -20 (-23.0 [-44.0; 5.9])    |
| June                | 72                         | 62                     | -10 (-13.9 [-38.7; 20.9])   |
| July                | 99                         | 110                    | 11 (11.1 [-15.3; 45.8])     |
| August              | 73                         | 84                     | 11 (15.1 [-15.9; 57.5])     |
| September           | 91                         | 95                     | 4 (4.4 [-21.7; 39.2])       |
| October             | 117                        | 86                     | -31 (-26.5 [-44.4; -2.9])   |
| November            | 83                         | 90                     | 7 ( 8.4 [-19.5; 46.1])      |
| December            | 97                         | 88                     | -9 (-9.3 [-32.0; 21.1])     |
| January             | 100                        | 87                     | -13 (-13.0 [-34.7; 16.0])   |
| February            | 113                        | 103                    | -10 (-8.8 [-30.2; 19.0])    |
| Total               | 1,101                      | 1,081                  | -20 (-1.8 [-9.7; 6.8])      |
| <b>Breast</b>       |                            |                        |                             |
| March               | 78                         | 66                     | -12 (-15.4 [-39.0; 17.4])   |
| April               | 68                         | 58                     | -10 (-14.7 [-39.9; 21.1])   |
| May                 | 71                         | 36                     | -35 (-49.3 [-66.0; -24.3])  |
| June                | 54                         | 51                     | -3 (-5.6 [-35.6; 38.5])     |
| July                | 78                         | 65                     | -13 (-16.7 [-40.0; 15.8])   |
| August              | 93                         | 52                     | -41 (-44.1 [-60.2; -21.5])  |
| September           | 70                         | 60                     | -10 (-14.3 [-39.3; 21.0])   |
| October             | 80                         | 81                     | 1 ( 1.2 [-25.7; 37.9])      |
| November            | 84                         | 89                     | 5 ( 6.0 [-21.4; 42.8])      |
| December            | 73                         | 75                     | 2 ( 2.7 [-25.6; 41.8])      |
| January             | 99                         | 72                     | -27 (-27.3 [-46.3; -1.5])   |
| February            | 57                         | 66                     | 9 (15.8 [-18.8; 65.0])      |
| Total               | 905                        | 771                    | -134 (-14.8 [-22.6; -6.2])  |
| <b>Colon</b>        |                            |                        |                             |
| March               | 26                         | 17                     | -9 (-34.6 [-64.5; 20.5])    |
| April               | 27                         | 14                     | -13 (-48.1 [-72.8; -1.1])   |
| May                 | 41                         | 20                     | -21 (-51.2 [-71.4; -16.7])  |
| June                | 25                         | 7                      | -18 (-72.0 [-87.9; -35.3])  |
| July                | 25                         | 17                     | -8 (-32.0 [-63.3; 25.9])    |
| August              | 26                         | 13                     | -13 (-50.0 [-74.3; -2.7])   |
| September           | 24                         | 12                     | -12 (-50.0 [-75.0; 0.0])    |
| October             | 17                         | 20                     | 3 (17.6 [-38.4; 124.6])     |



|                      |     |     |                             |
|----------------------|-----|-----|-----------------------------|
| November             | 23  | 17  | -6 (-26.1 [-60.5; 38.3])    |
| December             | 15  | 11  | -4 (-26.7 [-66.3; 59.7])    |
| January              | 18  | 17  | -1 (-5.6 [-51.3; 83.3])     |
| February             | 16  | 8   | -8 (-50.0 [-78.6; 16.8])    |
| Total                | 283 | 173 | -110 (-38.9 [-49.4; -26.1]) |
| <b>Skin/Melanoma</b> |     |     |                             |
| March                | 22  | 21  | -1 (-4.5 [-47.5; 73.6])     |
| April                | 31  | 17  | -14 (-45.2 [-69.6; -0.9])   |
| May                  | 21  | 11  | -10 (-47.6 [-74.7; 8.6])    |
| June                 | 24  | 15  | -9 (-37.5 [-67.2; 19.1])    |
| July                 | 29  | 20  | -9 (-31.0 [-61.0; 21.9])    |
| August               | 22  | 16  | -6 (-27.3 [-61.8; 38.5])    |
| September            | 20  | 24  | 4 (20.0 [-33.7; 117.2])     |
| October              | 23  | 26  | 3 (13.0 [-35.5; 98.1])      |
| November             | 25  | 23  | -2 (-8.0 [-47.8; 62.1])     |
| December             | 22  | 14  | -8 (-36.4 [-67.4; 24.4])    |
| January              | 17  | 15  | -2 (-11.8 [-55.9; 76.7])    |
| February             | 24  | 17  | -7 (-29.2 [-61.9; 31.8])    |
| Total                | 280 | 219 | -61 (-21.8 [-34.5; -6.7])   |

Notes: CI, confidence interval.

Supplementary Table 5: Number of incident malignant neoplasms (without cervix uteri) and carcinoma in situ (without cervix uteri) from March 2019 to February 2021, stratified by period (pre-pandemic: March 2019 to February 2020; pandemic: March 2020 to February 2021), month of year, and age group

|                           | Pre-pandemic period: Cases | Pandemic period: Cases | Difference (% [95% CI])     |
|---------------------------|----------------------------|------------------------|-----------------------------|
| <b>0-49 years</b>         |                            |                        |                             |
| March                     | 385                        | 366                    | -19 (-4.9 [-17.6; 9.7])     |
| April                     | 353                        | 319                    | -34 (-9.6 [-22.3; 5.1])     |
| May                       | 369                        | 301                    | -68 (-18.4 [-29.9; -5.0])   |
| June                      | 313                        | 337                    | 24 (7.7 [-7.7; 25.6])       |
| July                      | 419                        | 384                    | -35 (-8.4 [-20.2; 5.3])     |
| August                    | 353                        | 324                    | -29 (-8.2 [-21.1; 6.7])     |
| September                 | 357                        | 357                    | 0 (0.0 [-13.6; 15.8])       |
| October                   | 429                        | 392                    | -37 (-8.6 [-20.3; 4.8])     |
| November                  | 374                        | 355                    | -19 (-5.1 [-17.9; 9.8])     |
| December                  | 331                        | 340                    | 9 ( 2.7 [-11.7; 19.5])      |
| January                   | 383                        | 339                    | -44 (-11.5 [-23.5; 2.4])    |
| February                  | 326                        | 330                    | 4 (1.2 [-13.1; 18.0])       |
| Total                     | 4,392                      | 4,144                  | -248 (-5.6 [-9.6; -1.6])    |
| <b>50-69 years</b>        |                            |                        |                             |
| March                     | 1,766                      | 1,768                  | 2 (0.1 [-6.3; 6.9])         |
| April                     | 1,678                      | 1,378                  | -300 (-17.9 [-23.5; -11.8]) |
| May                       | 1,679                      | 1,386                  | -293 (-17.5 [-23.1; -11.4]) |
| June                      | 1,376                      | 1,538                  | 162 (11.8 [ 3.9; 20.2])     |
| July                      | 1,943                      | 1,791                  | -152 (-7.8 [-13.6; -1.7])   |
| August                    | 1,564                      | 1,496                  | -68 (-4.3 [-10.9; 2.7])     |
| September                 | 1,646                      | 1,654                  | 8 (0.5 [-6.1; 7.6])         |
| October                   | 1,791                      | 1,752                  | -39 (-2.2 [-8.4; 4.5])      |
| November                  | 1,654                      | 1,721                  | 67 ( 4.1 [-2.7; 11.3])      |
| December                  | 1,627                      | 1,531                  | -96 (-5.9 [-12.2; 0.9])     |
| January                   | 1,806                      | 1,322                  | -484 (-26.8 [-31.8; -21.4]) |
| February                  | 1,696                      | 1,545                  | -151 (-8.9 [-15.0; -2.4])   |
| Total                     | 20,226                     | 18,882                 | -1,344 (-6.6 [-8.5; -4.8])  |
| <b>70 years and above</b> |                            |                        |                             |
| March                     | 1,690                      | 1,707                  | 17 (1.0 [-5.6; 8.0])        |
| April                     | 1,705                      | 1,263                  | -442 (-25.9 [-31.1; -20.3]) |
| May                       | 1,877                      | 1,426                  | -451 (-24.0 [-29.1; -18.6]) |
| June                      | 14,42                      | 1,630                  | 188 (13.0 [ 5.3; 21.3])     |
| July                      | 2,004                      | 2,054                  | 50 ( 2.5 [-3.6; 9.0])       |
| August                    | 1,616                      | 1,577                  | -39 (-2.4 [-9.0; 4.6])      |
| September                 | 1,707                      | 1,730                  | 23 (1.3 [-5.2; 8.4])        |
| October                   | 1,839                      | 1,825                  | -14 (-0.8 [-7.0; 5.9])      |
| November                  | 1,748                      | 1,638                  | -110 (-6.3 [-12.4; 0.2])    |
| December                  | 1,509                      | 1,394                  | -115 (-7.6 [-14.1; -0.6])   |
| January                   | 1,866                      | 1,371                  | -495(-26.5 [-31.5; -21.2])  |
| February                  | 1,811                      | 1,590                  | -221 (-12.2 [-17.9; -6.1])  |
| Total                     | 20,814                     | 19,205                 | -1,609 (-7.7 [-9.5; -5.9])  |

Notes: CI, confidence interval.

Supplementary Table 6: Number of incident malignant neoplasms (without cervix uteri) and carcinoma in situ (without cervix uteri) from March 2019 to February 2021, stratified by period (pre-pandemic: March 2019 to February 2020; pandemic: March 2020 to February 2021), month of year, and sex

|               | Pre-pandemic period: Cases | Pandemic period: Cases | Difference (% [95% CI])     |
|---------------|----------------------------|------------------------|-----------------------------|
| <b>Female</b> |                            |                        |                             |
| March         | 1,899                      | 1,858                  | -41 (-2.2 [-8.2; 4.3])      |
| April         | 1,863                      | 1,401                  | -462 (-24.8 [-29.8; -19.4]) |
| May           | 1,883                      | 1,476                  | -407 (-21.6 [-26.8; -16.1]) |
| June          | 1,456                      | 1,686                  | 230 (15.8 [ 8.0; 24.2])     |
| July          | 2,106                      | 2,033                  | -73 (-3.5 [-9.2; 2.6])      |
| August        | 1,714                      | 1,676                  | -38 (-2.2 [-8.6; 4.6])      |
| September     | 1,778                      | 1,863                  | 85 ( 4.8 [-1.8; 11.8])      |
| October       | 1,982                      | 1,938                  | -44 (-2.2 [-8.2; 4.1])      |
| November      | 1,830                      | 1,830                  | 0 ( 0.0 [-6.3; 6.7])        |
| December      | 1,691                      | 1,681                  | -10 (-0.6 [-7.1; 6.4])      |
| January       | 1,903                      | 1,514                  | -389 (-20.4 [-25.6; -14.9]) |
| February      | 1,851                      | 1,706                  | -145 (-7.8 [-13.7; -1.6])   |
| Total         | 21,956                     | 20,662                 | -1,294 (-5.9 [-7.7; -4.1])  |
| <b>Male</b>   |                            |                        |                             |
| March         | 1,942                      | 1,982                  | 40 ( 2.1 [-4.1; 8.7])       |
| April         | 1,872                      | 1,559                  | -313 (-16.7 [-22.1; -10.9]) |
| May           | 2,041                      | 1,637                  | -404 (-19.8 [-24.8; -14.4]) |
| June          | 1,675                      | 1,819                  | 144 (8.6 [ 1.6; 16.0])      |
| July          | 2,260                      | 2,195                  | -65 (-2.9 [-8.4; 3.0])      |
| August        | 1,818                      | 1,721                  | -97 (-5.3 [-11.4; 1.1])     |
| September     | 1,930                      | 1,878                  | -52 (-2.7 [-8.7; 3.7])      |
| October       | 2,077                      | 2,031                  | -46 (-2.2 [-8.0; 4.0])      |
| November      | 1,945                      | 1,883                  | -62 (-3.2 [-9.1; 3.1])      |
| December      | 1,776                      | 1,584                  | -192 (-10.8 [-16.7; -4.6])  |
| January       | 2,152                      | 1,517                  | -635 (-29.5 [-34.0; -24.7]) |
| February      | 1,982                      | 1,758                  | -224 (-11.3 [-16.8; -5.4])  |
| Total         | 23,470                     | 21,564                 | -1,906 (-8.1 [-9.8; -6.4])  |

Notes: CI, confidence interval.
